# Supplementary material for: Increased VEGF‐A promotes multiple distinct aging diseases of the eye through shared pathomechanisms
Source: PubMed Central journal article supplement (PMC4772957; doi:10.15252/emmm.201505613), 2016-02-24
Supplement: EMMM-8-208-s001.pdf [file EMMM-8-208-s001.pdf]

**APPENDIX:**

**1. Appendix Figure legends S1 to S6 and Appendix Table S1.**

**2. Appendix Figures S1 to S6**

## APPENDIX FIGURE LEGENDS:

### Appendix Figure S1: Quantification of cataract formation in VEGF-A<sup>hyper</sup> mice and WT littermate mice, as well as mouse groups lacking Nlrp3 or Il1r1.

A. Calculation of p-values in mouse groups >18 months of age with +3 cataracts. P-values were calculated with a two-tailed unpaired student's t-test.

B. Cataracts were graded from 0 (no cataract) to +1 (mild), +2 (moderate) or +3 (severe) cataract. Values indicate mean  $\pm$  SEM in groups of mice >18 months of age (N indicates number of mice in these groups that were available for analysis).

C. Tables show absolute numbers and percentile numbers of cataracts for each grading in each age-group of VEGF-A<sup>hyper</sup> mice, WT mice, Nlrp3<sup>-/-</sup> mice, VEGF-A<sup>hyper</sup>/Nlrp3<sup>-/-</sup> mice, Il1r1<sup>-/-</sup> mice, and VEGF-A<sup>hyper</sup>/Il1r1<sup>-/-</sup> mice.

### Appendix Figure S2: AMD-like pathologies in aged VEGF-A<sup>hyper</sup> mice.

A.-D. Electron microscopy images of 21-months old wild-type control littermate mice (WT) and age-matched VEGF-A<sup>hyper</sup> mice. WT littermate mice show a normal RPE cell layer and Bruch's membrane (\*). Photoreceptor outer segments (OS) interdigitate with RPE apical villi. In age-matched VEGF-A<sup>hyper</sup> mice there is accumulation of sub-RPE basal laminar-like deposits that are associated with degenerative changes of the RPE (including RPE atrophy and loss of pigment granules) and photoreceptor degeneration.

White double arrows indicate RPE. Black double arrows indicate sub-RPE deposits.

Scale bars for A, B and D are 500nm and for C 2 $\mu$ m.

E. Light microscopy image of a WT control littermate mouse eye (28-months old). Asterisk (\*) indicates normal Bruch's membrane. Normal age-appropriate RPE cell layer without atrophy or pigment loss is seen. Photoreceptors show no degenerative changes.

F.-H. Thickened Bruch's membrane (\*) with sub-RPE deposits that protrude into the RPE cell plane (white arrows). These deposits are separated from the photoreceptors by a layer of abnormal RPE cells (black arrows). Degenerative changes of the adjacent photoreceptors are observed (red arrows). CNV vessel containing erythrocytes is separated from the photoreceptor layer by RPE cells (yellow arrow in H.). Scale bars 20 $\mu$ m.

Chor: choroid; RPE: retinal pigment epithelium; ONL: outer nuclear layer; OS: photoreceptor outer segments; \*: Bruch's membrane.

**Appendix Figure S3: Electron microscopy shows degenerative changes of the RPE, Bruch's membrane and photoreceptors in aged VEGF-A<sup>hyper</sup> mice.**

A.-J. Representative electron microscopy images of the choroid/RPE/photoreceptor interface in 21-months old VEGF-A<sup>hyper</sup> mice show Bruch's membrane thickening (\*), sub-RPE deposit formation (white arrows), RPE degeneration (with atypical pigment granules and loss of pigment, as well as RPE atrophy and degenerative changes) (black arrows), and photoreceptor abnormalities (red arrows). Endothelial fenestrations of the choriocapillaris are maintained in these aged VEGF-A<sup>hyper</sup> mice (yellow arrow; seen in J).

Scale bars: A, B and E 600nm; C 2.1 $\mu$ m; D, F, G and I 2 $\mu$ m; H 450nm; and J 90nm.

**Appendix Figure S4: Conditional inactivation of Flk1 in the RPE inhibits CNV lesion formation in VEGF-A<sup>hyper</sup> mice.**

Choroidal flat mount staining of a 8-months old Vmd2Cre<sup>+WT</sup>Flk1<sup>fl/fl</sup> VEGF-A<sup>hyper</sup> mouse shows nuclear  $\beta$ -gal staining (green), representing VEGF-A expression in the RPE. Uniform nuclear Cre staining (red) is observed in RPE cells of Vmd2Cre<sup>+WT</sup>Flk1<sup>fl/fl</sup> VEGF-A<sup>hyper</sup> mice. Phalloidin staining (white) shows no CNV lesion formation in this eye (upper panel). Nuclear co-localization of Cre and  $\beta$ -gal staining shown in higher magnification images from this flat mount staining (lower panel). Scale bars: upper panel 200  $\mu$ m, lower panel 50 $\mu$ m.

**Appendix Figure S5: CNV lesion formation is regulated by NLRP3 inflammasome components in VEGF-A<sup>hyper</sup> mice.**

A. Square root transformation of CNV lesion numbers/eye in each experimental mouse group. Casp1/Casp11, Nlrp3 or Il1r1 deficiency results in significantly fewer CNV lesions.

B. Log transformation of average CNV lesion area/eye in each experimental mouse group. Lack of Tlr2 or Casp1/Casp11 significantly reduces CNV lesion size, while reduced autophagy moderately increases CNV size.

Graphs indicate values for each individual mouse. Mean  $\pm$  SEM is shown. P-values are compared with the VEGF-A<sup>hyper</sup> mouse group in each graph. Absolute numbers of mice per group are indicated in ( ). P-values were calculated with a two-tailed unpaired student's t-test. Separately, p-values are shown between VEGF-

$A^{hyper}/Casp1^{-}/Casp11^{-}$  and  $VEGF-A^{hyper}/Nlrp3^{-}$  or  $VEGF-A^{hyper}/Il1r1^{-}$  mouse groups. WT mice developed no CNV lesions.

**Appendix Figure S6:  $Nlrp3^{A350VneoR}$  mice, referred to as  $Nlrp3^{-}$  mice, lack  $Nlrp3$  transcripts.**

RT-PCR using primers that span exon 2 and exon 3 of  $Nlrp3$  show expression of  $Nlrp3$  in spleen of WT or  $VEGF-A^{hyper}$  mice, but not in mice with the  $Nlrp3^{A350VneoR}$  allele ( $Nlrp3^{-}$  mice), which have a *neoR* cassette in intron 2 of the  $Nlrp3$  gene. 36B4: housekeeping gene control.

**Appendix Table S1:**

Semiquantitative RT-PCR primers used in this study:

| Primer Name                       | Primer Sequence           |
|-----------------------------------|---------------------------|
| m36B4 up                          | TCACTGTGCCAGCTCAGAAC      |
| m36B4 dw                          | AATTTCAATGGTGCCTCTGG      |
| mCatalase up                      | TGAGAAGCCTAAGAACGCAATTC   |
| mCatalase dw                      | CCCTTCGCAGCCATGTG         |
| mGP91 phox up                     | TTGGGTCAGCACTGGCTCTG      |
| mGP91 phox dw                     | TGGCGGTGTGCAGTGCTATC      |
| mGPx1 up                          | CGCTTTCGTACCATCGACATC     |
| mGPx1 dw                          | GGGCCGCCTTAGGAGTTG        |
| mIL1b up                          | GCTTCCAAACCTTTGACCTG      |
| mIL1b dw                          | CTGTTGTTTCCCAGGAAGAC      |
| mIL18 up                          | CAGGCCTGACATCTTCTGCAA     |
| mIL18 dw                          | CTGACATGGCAGCCATTGT       |
| mNLRP3 up                         | GTGGATGGGTTTGCTGGGAT      |
| mNLRP3 dw                         | TCTTGCACTGGTGGGTTT        |
| mSOD1 up                          | GTGATTGGGATTGCGCAGTA      |
| mSOD1 dw                          | TGGTTTGAGGGTAGCAGATGAGT   |
| total VEGFA R (VEGF A rev)        | CATCAGCGGCACACAGGACGG     |
| total isoform common (VEGF A for) | CCCACGACAGAAGGAGAGCAGAAGT |

p-values 18+ months groups

|          |                                                                          |         |
|----------|--------------------------------------------------------------------------|---------|
| <b>A</b> | WT vs VEGF-A <sup>hyper</sup>                                            | <0.0001 |
|          | Nlrp3 <sup>-/-</sup> vs VEGF-A <sup>hyper</sup> /Nlrp3 <sup>-/-</sup>    | 0.0002  |
|          | WT vs Nlrp3 <sup>-/-</sup>                                               | 0.0363  |
|          | VEGF-A <sup>hyper</sup> vs VEGF-A <sup>hyper</sup> /Nlrp3 <sup>-/-</sup> | 0.6369  |
|          | WT vs VEGF-A <sup>hyper</sup> /Nlrp3 <sup>-/-</sup>                      | <0.0001 |

MEAN ± SEM, N  
(18+ months old groups)

|          |                                               |                        |
|----------|-----------------------------------------------|------------------------|
| <b>B</b> | WT                                            | 0.7403 ± 0.07811 N=181 |
|          | Nlrp3 <sup>-/-</sup>                          | 0.0 ± 0.0 N=9          |
|          | VEGF-A <sup>hyper</sup>                       | 2.037 ± 0.1733 N=54    |
|          | VEGF-A <sup>hyper</sup> /Nlrp3 <sup>-/-</sup> | 1.893 ± 0.2589 N=28    |

|          |              |       |       |      |       |     |                         |       |       |       |     |
|----------|--------------|-------|-------|------|-------|-----|-------------------------|-------|-------|-------|-----|
| <b>C</b> | absolute     | WT    |       |      |       | sum | VEGF-A <sup>hyper</sup> |       |       |       | sum |
|          |              | 0     | 1     | 2    | 3     |     | 0                       | 1     | 2     | 3     |     |
|          | 0-3 months   | 82    | 0     | 0    | 1     | 83  | 47                      | 3     | 0     | 0     | 50  |
|          | 3-6 months   | 18    | 1     | 0    | 0     | 19  | 9                       | 0     | 0     | 2     | 11  |
|          | 6-9 months   | 17    | 0     | 0    | 1     | 18  | 6                       | 3     | 2     | 4     | 15  |
|          | 9-12 months  | 44    | 2     | 1    | 0     | 47  | 15                      | 4     | 3     | 15    | 37  |
|          | 12-18 months | 31    | 6     | 1    | 0     | 38  | 5                       | 7     | 6     | 21    | 39  |
|          | 18+ months   | 107   | 36    | 16   | 22    | 181 | 12                      | 6     | 4     | 32    | 54  |
|          | sum          | 299   | 45    | 18   | 24    | 386 | 94                      | 23    | 15    | 74    | 206 |
|          | %            | WT    |       |      |       | sum | VEGF-A <sup>hyper</sup> |       |       |       | sum |
|          |              | 0     | 1     | 2    | 3     |     | 0                       | 1     | 2     | 3     |     |
|          | 0-3 months   | 98.80 | 0.00  | 0.00 | 1.20  | 100 | 94.00                   | 6.00  | 0.00  | 0.00  | 100 |
|          | 3-6 months   | 94.74 | 5.26  | 0.00 | 0.00  | 100 | 81.82                   | 0.00  | 0.00  | 18.18 | 100 |
|          | 6-9 months   | 94.44 | 0.00  | 0.00 | 5.56  | 100 | 40.00                   | 20.00 | 13.33 | 26.67 | 100 |
|          | 9-12 months  | 93.62 | 4.26  | 2.13 | 0.00  | 100 | 40.54                   | 10.81 | 8.11  | 40.54 | 100 |
|          | 12-18 months | 81.58 | 15.79 | 2.63 | 0.00  | 100 | 12.82                   | 17.95 | 15.38 | 53.85 | 100 |
|          | 18+ months   | 59.12 | 19.89 | 8.84 | 12.15 | 100 | 22.22                   | 11.11 | 7.41  | 59.26 | 100 |

|  |              |                      |       |       |      |     |                                               |       |      |       |     |
|--|--------------|----------------------|-------|-------|------|-----|-----------------------------------------------|-------|------|-------|-----|
|  | absolute     | Nlrp3 <sup>-/-</sup> |       |       |      | sum | VEGF-A <sup>hyper</sup> /Nlrp3 <sup>-/-</sup> |       |      |       | sum |
|  |              | 0                    | 1     | 2     | 3    |     | 0                                             | 1     | 2    | 3     |     |
|  | 0-3 months   | 56                   | 0     | 0     | 0    | 56  | 59                                            | 0     | 0    | 0     | 59  |
|  | 3-6 months   | 36                   | 0     | 0     | 3    | 39  | 20                                            | 0     | 0    | 1     | 21  |
|  | 6-9 months   | 9                    | 1     | 0     | 0    | 10  | 17                                            | 1     | 1    | 4     | 23  |
|  | 9-12 months  | 20                   | 3     | 0     | 0    | 23  | 22                                            | 2     | 1    | 4     | 29  |
|  | 12-18 months | 8                    | 0     | 1     | 0    | 9   | 13                                            | 2     | 1    | 8     | 24  |
|  | 18+ months   | 9                    | 0     | 0     | 0    | 9   | 8                                             | 3     | 1    | 16    | 28  |
|  | sum          | 138                  | 4     | 1     | 3    | 146 | 139                                           | 8     | 4    | 33    | 184 |
|  | %            | Nlrp3 <sup>-/-</sup> |       |       |      | sum | VEGF-A <sup>hyper</sup> /Nlrp3 <sup>-/-</sup> |       |      |       | sum |
|  |              | 0                    | 1     | 2     | 3    |     | 0                                             | 1     | 2    | 3     |     |
|  | 0-3 months   | 100.00               | 0.00  | 0.00  | 0.00 | 100 | 100.00                                        | 0.00  | 0.00 | 0.00  | 100 |
|  | 3-6 months   | 92.31                | 0.00  | 0.00  | 7.69 | 100 | 95.24                                         | 0.00  | 0.00 | 4.76  | 100 |
|  | 6-9 months   | 90.00                | 10.00 | 0.00  | 0.00 | 100 | 73.91                                         | 4.35  | 4.35 | 17.39 | 100 |
|  | 9-12 months  | 86.96                | 13.04 | 0.00  | 0.00 | 100 | 75.86                                         | 6.90  | 3.45 | 13.79 | 100 |
|  | 12-18 months | 88.89                | 0.00  | 11.11 | 0.00 | 100 | 54.17                                         | 8.33  | 4.17 | 33.33 | 100 |
|  | 18+ months   | 100.00               | 0.00  | 0.00  | 0.00 | 100 | 28.57                                         | 10.71 | 3.57 | 57.14 | 100 |

|  |              |                      |      |      |      |     |                                               |       |      |       |     |
|--|--------------|----------------------|------|------|------|-----|-----------------------------------------------|-------|------|-------|-----|
|  | absolute     | Il1r1 <sup>-/-</sup> |      |      |      | sum | VEGF-A <sup>hyper</sup> /Il1r1 <sup>-/-</sup> |       |      |       | sum |
|  |              | 0                    | 1    | 2    | 3    |     | 0                                             | 1     | 2    | 3     |     |
|  | 0-3 months   | 62                   | 0    | 0    | 0    | 62  | 15                                            | 0     | 0    | 0     | 15  |
|  | 3-6 months   | 39                   | 0    | 0    | 0    | 39  | 1                                             | 0     | 0    | 0     | 1   |
|  | 6-9 months   | 20                   | 0    | 0    | 0    | 20  | 3                                             | 1     | 0    | 1     | 5   |
|  | 9-12 months  | 15                   | 0    | 0    | 0    | 15  | 7                                             | 0     | 0    | 0     | 7   |
|  | 12-18 months | 6                    | 0    | 0    | 0    | 6   | 3                                             | 1     | 0    | 1     | 5   |
|  | 18+ months   | 17                   | 1    | 0    | 1    | 19  | 6                                             | 4     | 0    | 1     | 11  |
|  | sum          | 159                  | 1    | 0    | 1    | 161 | 35                                            | 6     | 0    | 3     | 44  |
|  | %            | Il1r1 <sup>-/-</sup> |      |      |      | sum | VEGF-A <sup>hyper</sup> /Il1r1 <sup>-/-</sup> |       |      |       | sum |
|  |              | 0                    | 1    | 2    | 3    |     | 0                                             | 1     | 2    | 3     |     |
|  | 0-3 months   | 100.00               | 0.00 | 0.00 | 0.00 | 100 | 100.00                                        | 0.00  | 0.00 | 0.00  | 100 |
|  | 3-6 months   | 100.00               | 0.00 | 0.00 | 0.00 | 100 | 100.00                                        | 0.00  | 0.00 | 0.00  | 100 |
|  | 6-9 months   | 100.00               | 0.00 | 0.00 | 0.00 | 100 | 60.00                                         | 20.00 | 0.00 | 20.00 | 100 |
|  | 9-12 months  | 100.00               | 0.00 | 0.00 | 0.00 | 100 | 100.00                                        | 0.00  | 0.00 | 0.00  | 100 |
|  | 12-18 months | 100.00               | 0.00 | 0.00 | 0.00 | 100 | 60.00                                         | 20.00 | 0.00 | 20.00 | 100 |
|  | 18+ months   | 89.47                | 5.26 | 0.00 | 5.26 | 100 | 54.55                                         | 36.36 | 0.00 | 9.09  | 100 |

Appendix Figure S1

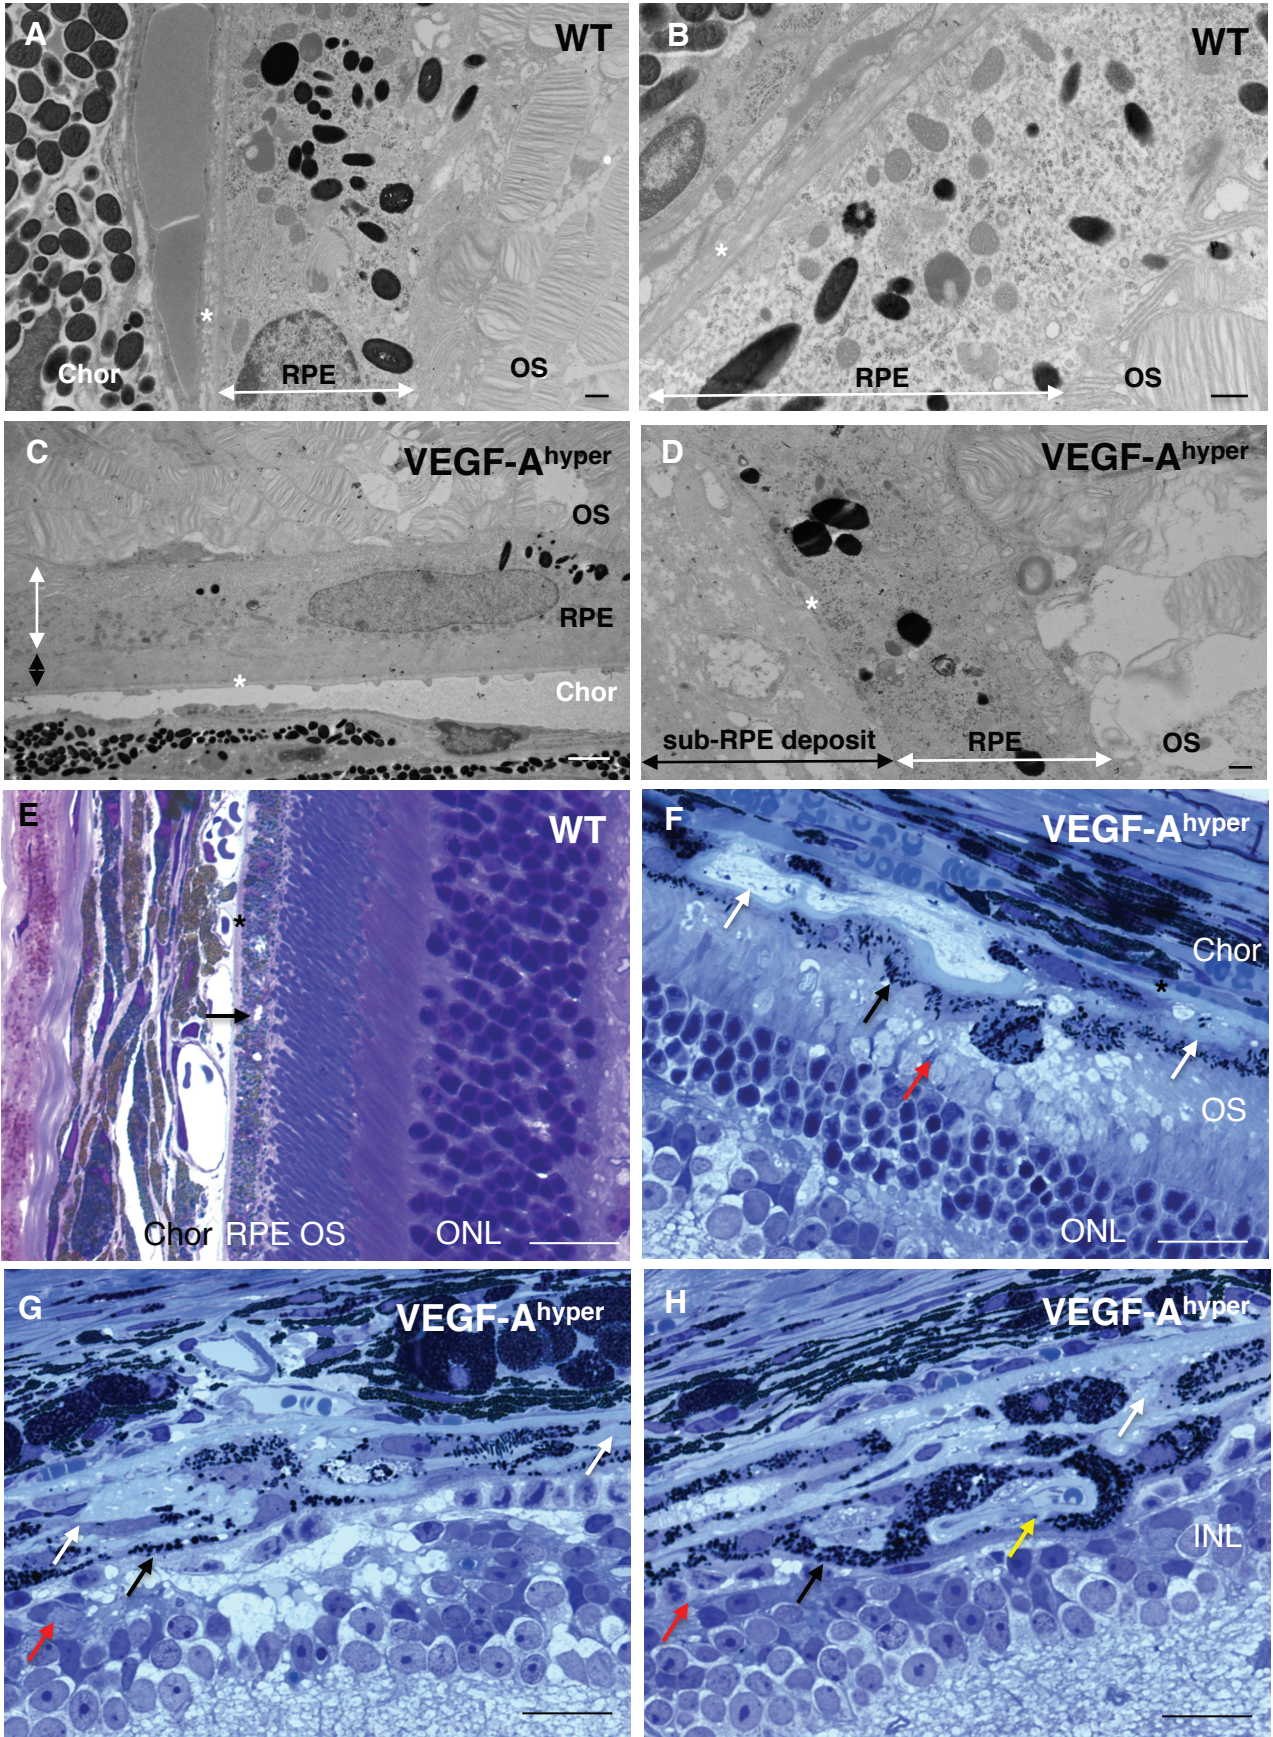

Appendix Figure S2

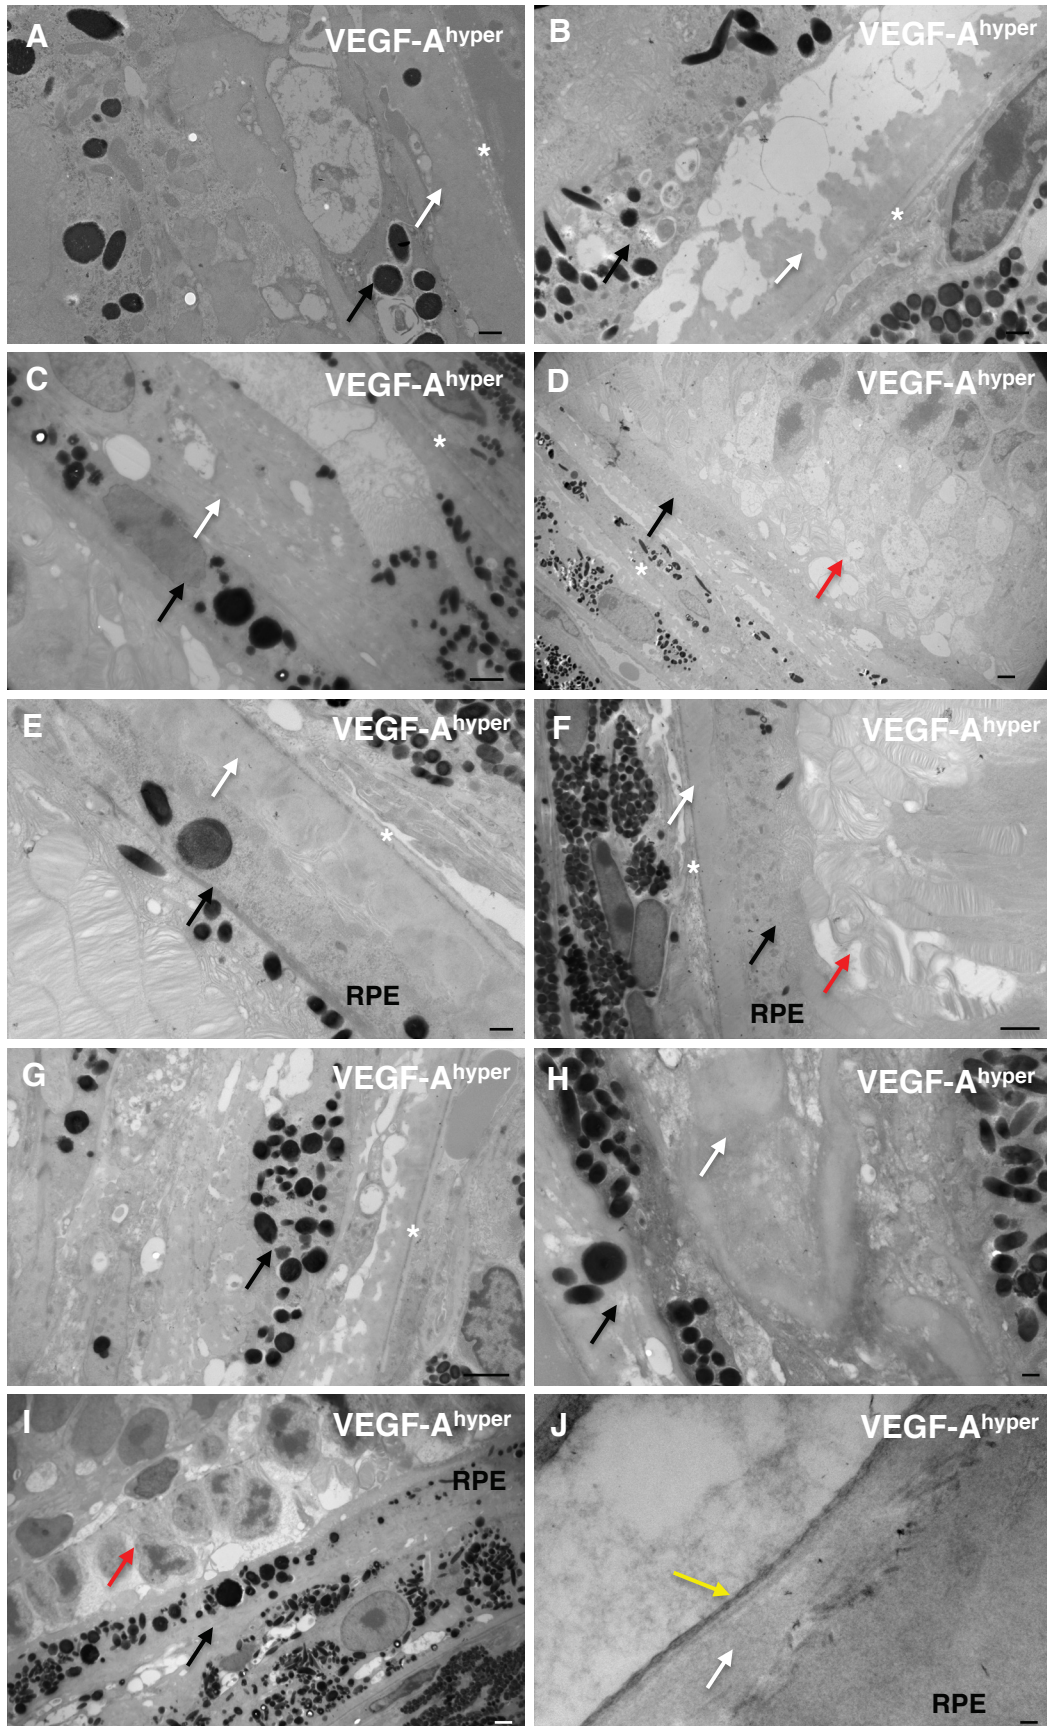

Appendix Figure S3

$\beta$ -gal(VEGF-A)/phalloidin(white)

phalloidin(white)/Cre

$\beta$ -gal(VEGF-A)/phalloidin(white)/Cre

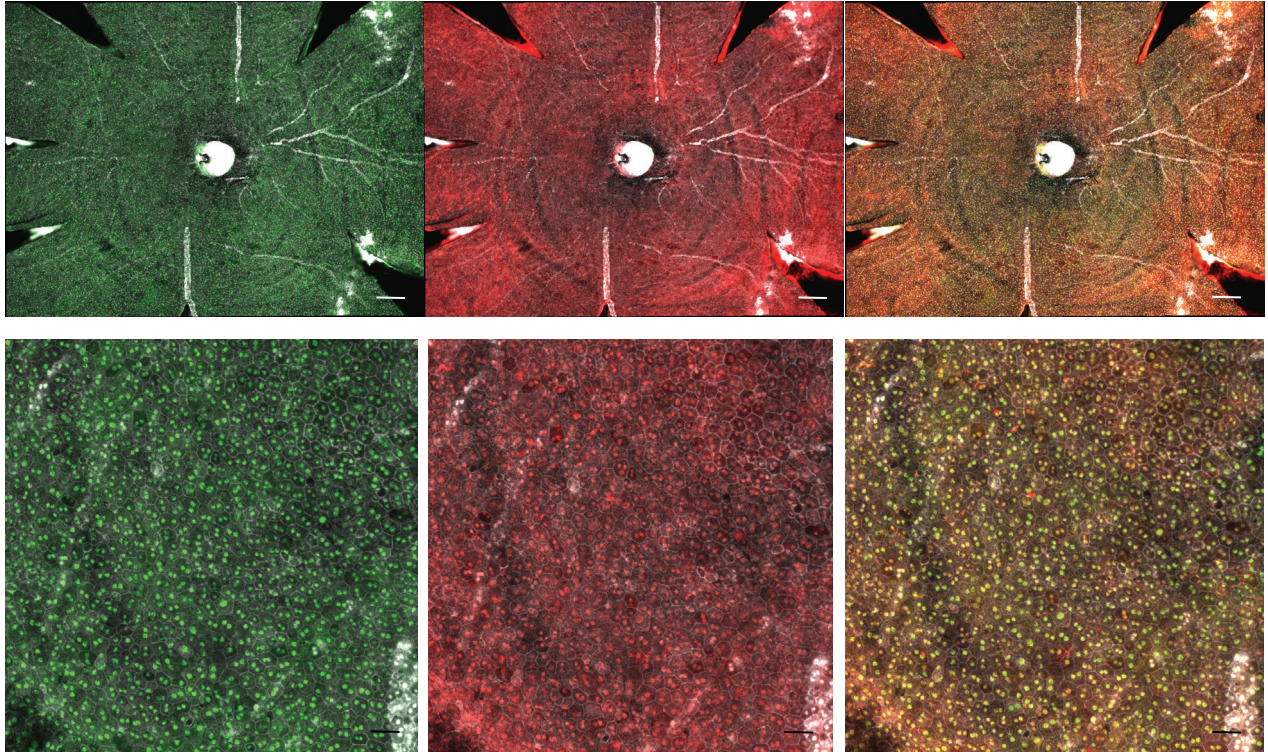

Appendix Figure S4



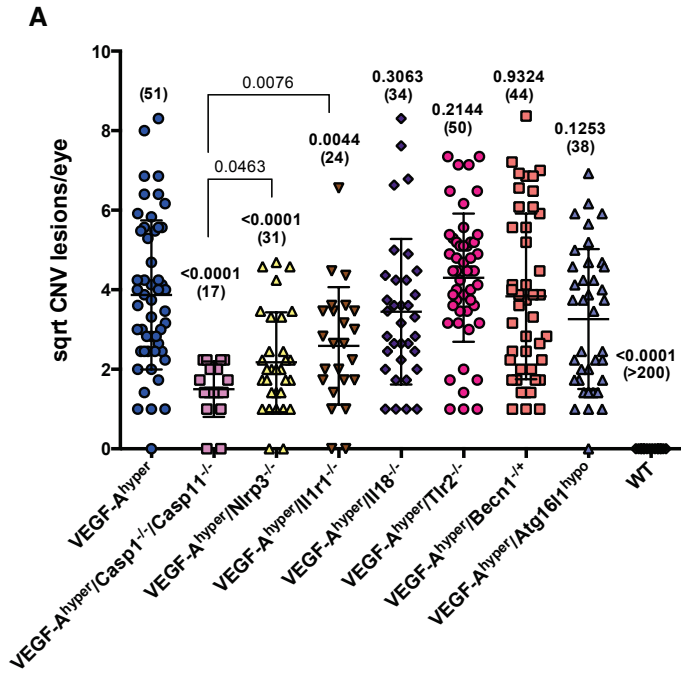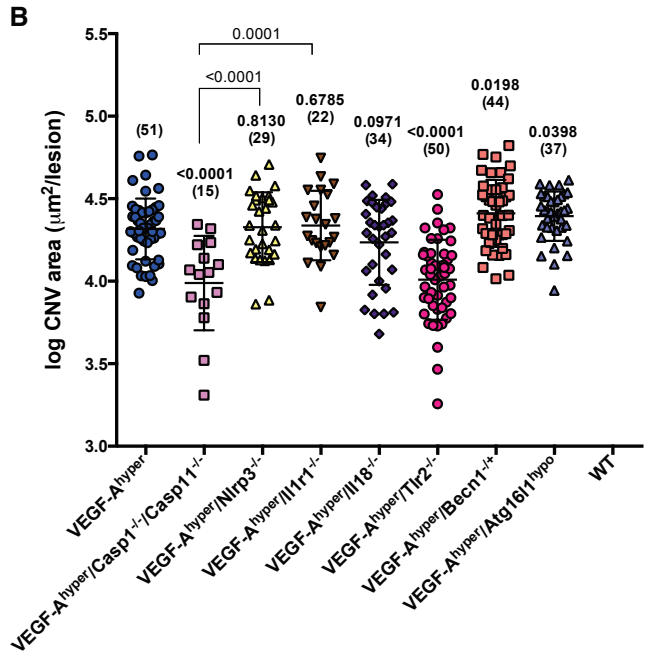

Appendix Figure S5

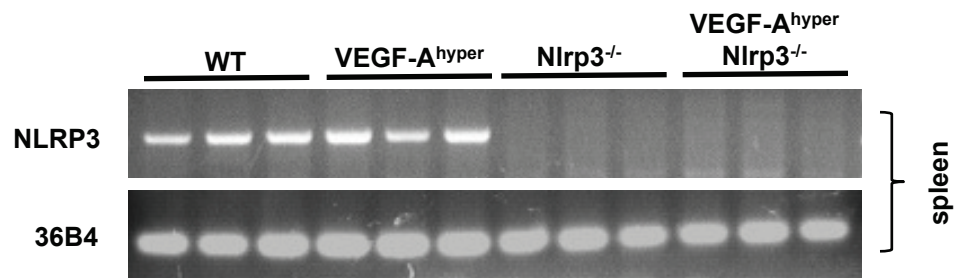

Appendix Figure S6
