# Supplementary material for: Increased VEGF‐A promotes multiple distinct aging diseases of the eye through shared pathomechanisms
Source: PubMed Central journal article supplement (PMC4772957; doi:10.15252/emmm.201505613), 2016-02-24
Supplement: EMMM-8-208-s002.pdf [file EMMM-8-208-s002.pdf]

**Figure 2B,  
uncropped gels  
lens, RT-PCR**

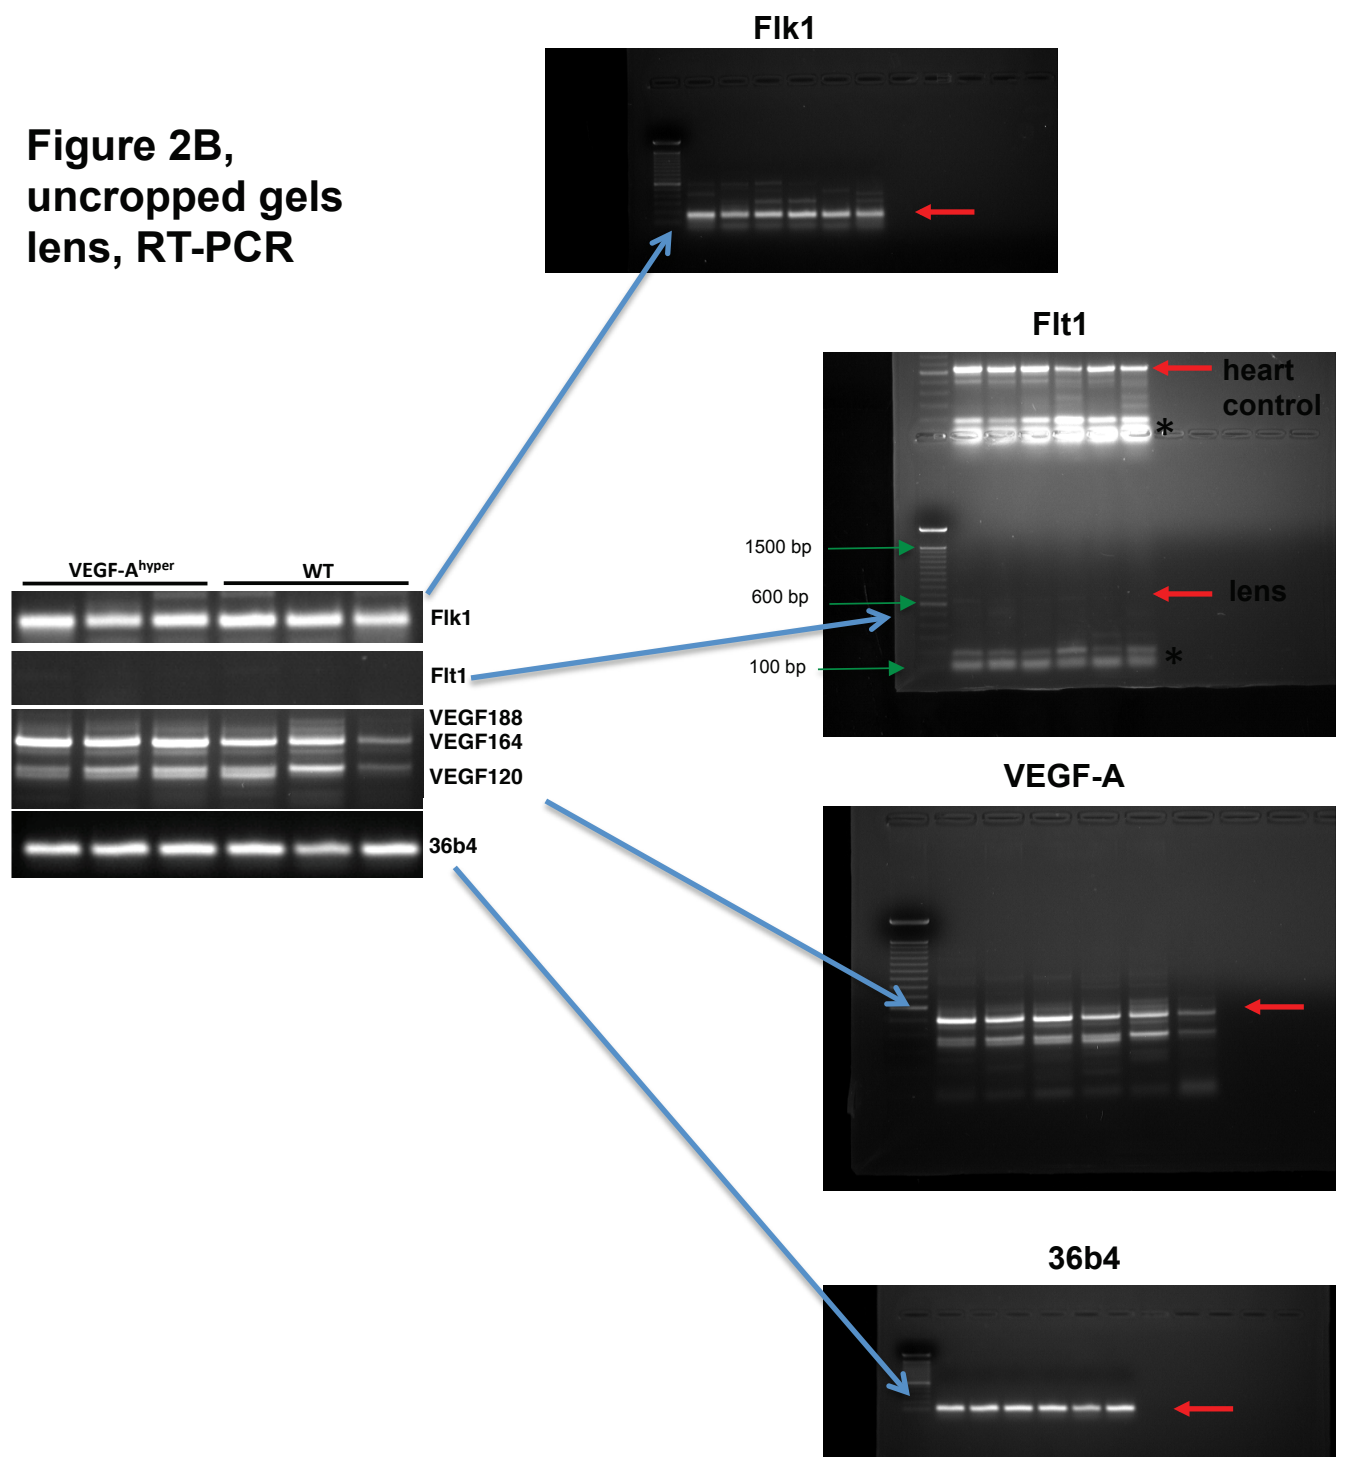

\* background band

red arrows indicate expected bands  
(for all gels TrackIt 100bp DNA ladder  
was used (Life Technologies))
