# Supplementary material for: Increased VEGF‐A promotes multiple distinct aging diseases of the eye through shared pathomechanisms
Source: PubMed Central journal article supplement (PMC4772957; doi:10.15252/emmm.201505613), 2016-02-24

# Full unedited gel, Figure 3a

Lens  
ERK-P

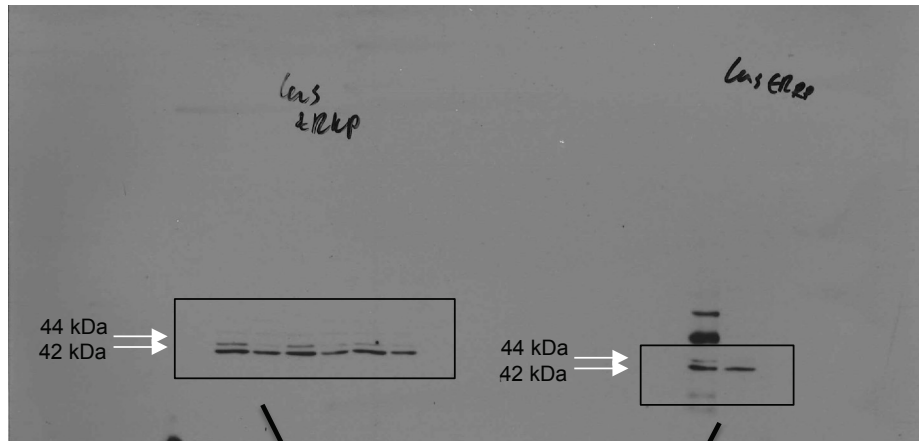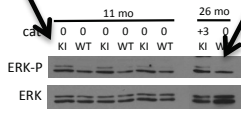

Lens  
Total ERK

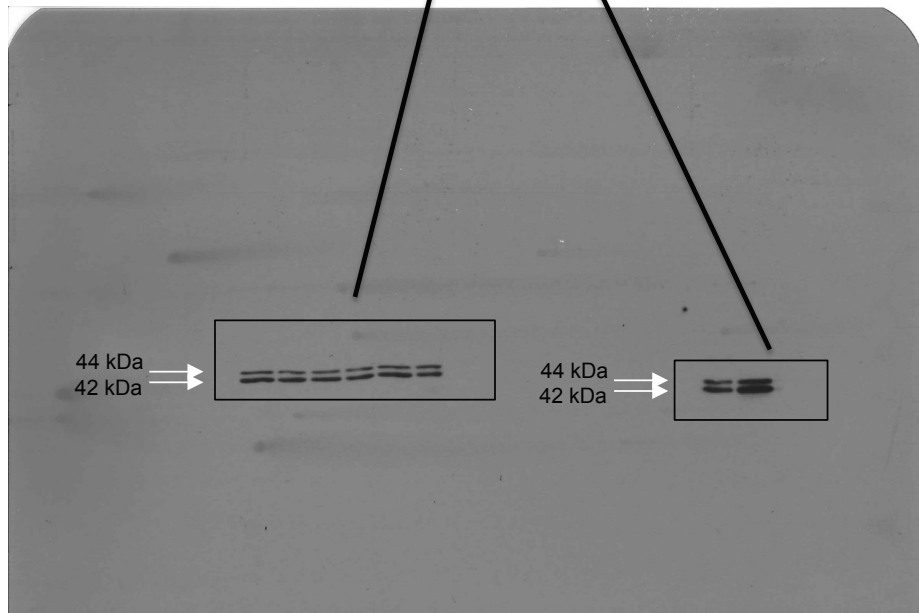

Supplement: EMMM-8-208-s003.pdf [file EMMM-8-208-s003.pdf]
